# Supplementary material for: Neuronal Transdifferentiation Potential of Human Mesenchymal Stem Cells from Neonatal and Adult Sources by a Small Molecule Cocktail
Source: Hindawi journal article supplement (doi:10.1155/2019/7627148), 2019-04-01
Supplement: f1 [file 7627148.f1.pdf]

## SUPPLEMENTARY MATERIAL

**Supplementary Table 1. Cell-tissue source information.** Three biological replicates were used for each MSC source. Neonatal MSCs were isolated from discarded tissues from the births of 37- to 40-week pregnancies. All samples were obtained from healthy donors and isolated as described in the methods section.

| ADULT SOURCES                   |                        |     |                        |     |                        |     |
|---------------------------------|------------------------|-----|------------------------|-----|------------------------|-----|
| MSC SOURCE                      | Biological Replicate 1 |     | Biological Replicate 2 |     | Biological Replicate 3 |     |
|                                 | AGE                    | SEX | AGE                    | SEX | AGE                    | SEX |
| DENTAL PULP                     | 17                     | F   | 28                     | F   | 30                     | F   |
| PERIODONTAL LIGAMENT            | 17                     | F   | 28                     | F   | 30                     | F   |
| GINGIVAL TISSUE                 | 17                     | F   | 28                     | F   | 30                     | F   |
| SKIN                            | 34                     | M   | 32                     | M   | 35                     | M   |
| BONE MARROW                     | 25                     | M   | 30                     | M   | 27                     | M   |
| NEONATAL SOURCES (Mother's age) |                        |     |                        |     |                        |     |
| MSC SOURCE                      | Biological Replicate 1 |     | Biological Replicate 2 |     | Biological Replicate 3 |     |
| WHARTON JELLY                   | 25                     |     | 26                     |     | 22                     |     |
| UMBILICAL CORD BLOOD            | 25                     |     | 23                     |     | 27                     |     |
| PLACENTA                        | 32                     |     | 29                     |     | 27                     |     |

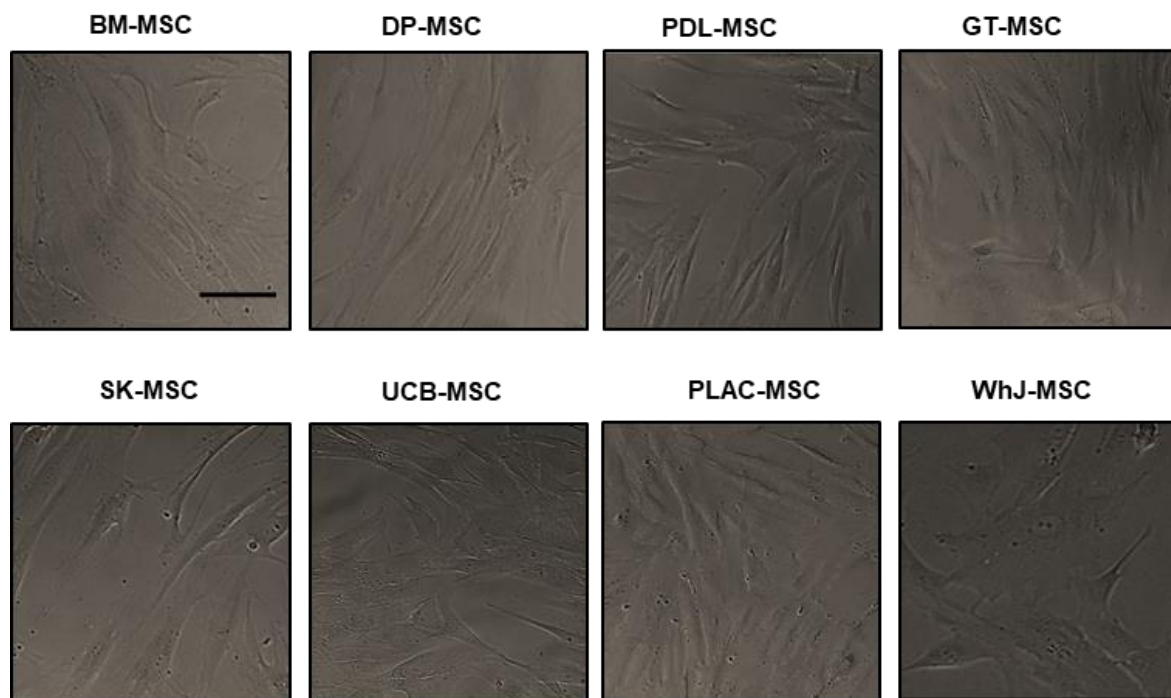

**Supplementary Figure 1. Fibroblast morphology of MSC sources.** After isolation, MSCs from the different sources presented a typical fibroblastic morphology. Although slight differences in extension or size were found, neuronal-like morphology was not observed in any MSC source. The scale bar represents 100  $\mu\text{m}$ .

**Supplementary Table 2. Mesenchymal lineage characterization by membrane markers.** All

samples present high percentages of mesenchymal markers and low percentages of hematopoietic markers. All data are presented as the mean (n=3) and standard deviation. ND: not detected

| <b>SURFACE MARKER</b> | <b>BM-MSC</b> | <b>GT-MSC</b> | <b>DP-MSC</b> | <b>PDL-MSC</b> | <b>SK-MSC</b> | <b>UCB-MSC</b> | <b>PLAC-MSC</b> | <b>WhJ-MSC</b> |
|-----------------------|---------------|---------------|---------------|----------------|---------------|----------------|-----------------|----------------|
| <b>CD105</b>          | 95±8.1        | 99.7±0.08     | 92.0±7.6      | 95.8±3.96      | 96.4±2.90     | 91.7±0.88      | 93.7±0.88       | 89.3±2.96      |
| <b>CD90</b>           | 99±0.3        | 99.7±0.19     | 99.8±0.13     | 99.6±0.17      | 97.2±1.31     | 77.0±3.51      | 80.0±5.77       | 93.3±2.85      |
| <b>CD73</b>           | 99±0.2        | 99.8±0.04     | 98.9±0.32     | 98.2±1.73      | 88.8±4.98     | 95.3±1.45      | 97.3±0.88       | 91.7±2.19      |
| <b>CD13</b>           | 100±0.0       | 99.8±0.03     | 96.1±0.283    | 99.4±0.41      | 96.6±2.58     | 96.7±0.88      | 98.7±0.33       | ND             |
| <b>HLA-I</b>          | 61±22.7       | 63.0±31.3     | 53.5±26.5     | 54.5±28.4      | 15.0±6.70     | 87.7±4.33      | 92.3±1.20       | 65.7±15.7      |
| <b>HLA-II</b>         | 3.1±2.7       | 1.26±0.25     | 0.11±0.07     | 1.32±1.22      | 0.45±0.26     | 0.67±0.33      | 0.3±0.33        | 0.00±0.00      |
| <b>CD45</b>           | 0.4±0.3       | 0.06±0.06     | 0.07±0.05     | 0.11±0.06      | 0.99±0.43     | 0.33±0.33      | 0.3±0.33        | 0.33±0.33      |
| <b>CD34</b>           | 2.9±4.0       | 0.0±0.0       | 0.07±0.03     | 0.05±0.18      | 1.42±0.68     | 0.67±0.33      | 0.7±0.33        | 0.67±0.67      |
| <b>CD31</b>           | 0.4±0.4       | 0.25±0.13     | 0.26±0.21     | 0.37±0.07      | 1.04±0.41     | 0.00±0.00      | 0.3±0.33        | 0.33±0.33      |
| <b>CD14</b>           | 1.8±2.8       | 0.02±0.02     | 0.03±0.05     | 0.12±0.08      | 0.81±0.28     | 0.33±0.33      | 0.3±0.33        | ND             |

**Supplementary Table 3. Mesenchymal characterization by trilineage differentiation.** The capacity of differentiation into adipocytes, osteocytes and chondrocytes is represented by crosses, with limited (+) to elevated (+++++) differentiation potential. In SK-MSCs, the potential ranged from limited to middle. ND: not detected, BR: biological replicate

| MSCs-SOURCE | ADIPOGENIC |      |      | OSTEOGENIC |      |      | CHONDROGENIC |       |       |
|-------------|------------|------|------|------------|------|------|--------------|-------|-------|
|             | BR 1       | BR 2 | BR 3 | BR 1       | BR 2 | BR 3 | BR 1         | BR 2  | BR 3  |
| BM-MSC      | +++        | ++   | ++   | ++++       | ++++ | +++  | +++++        | +++++ | +++++ |
| GT-MSC      | ++         | +++  | ++   | ++++       | ++++ | +++  | +++++        | +++++ | +++   |
| DP-MSC      | +          | +    | +    | ++++       | ++++ | +++  | +++++        | +++++ | +++   |
| PDL-MSC     | ++         | ++   | +    | ++++       | ++++ | ++   | +++++        | +++++ | ++    |
| SK-MSC      | +          | ++   | +    | ++         | ++   | N.D. | +            | ++    | +     |
| UCB-MSC     | +          | +    | +    | ++         | ++   | ++   | +++          | +++   | +++   |
| PLAC-MSC    | +          | +    | +    | ++         | ++   | ++   | +++          | +++   | +++   |
| WhJ-MSC     | +          | +    | +    | ++         | ++   | ++   | +++          | +++   | +++   |

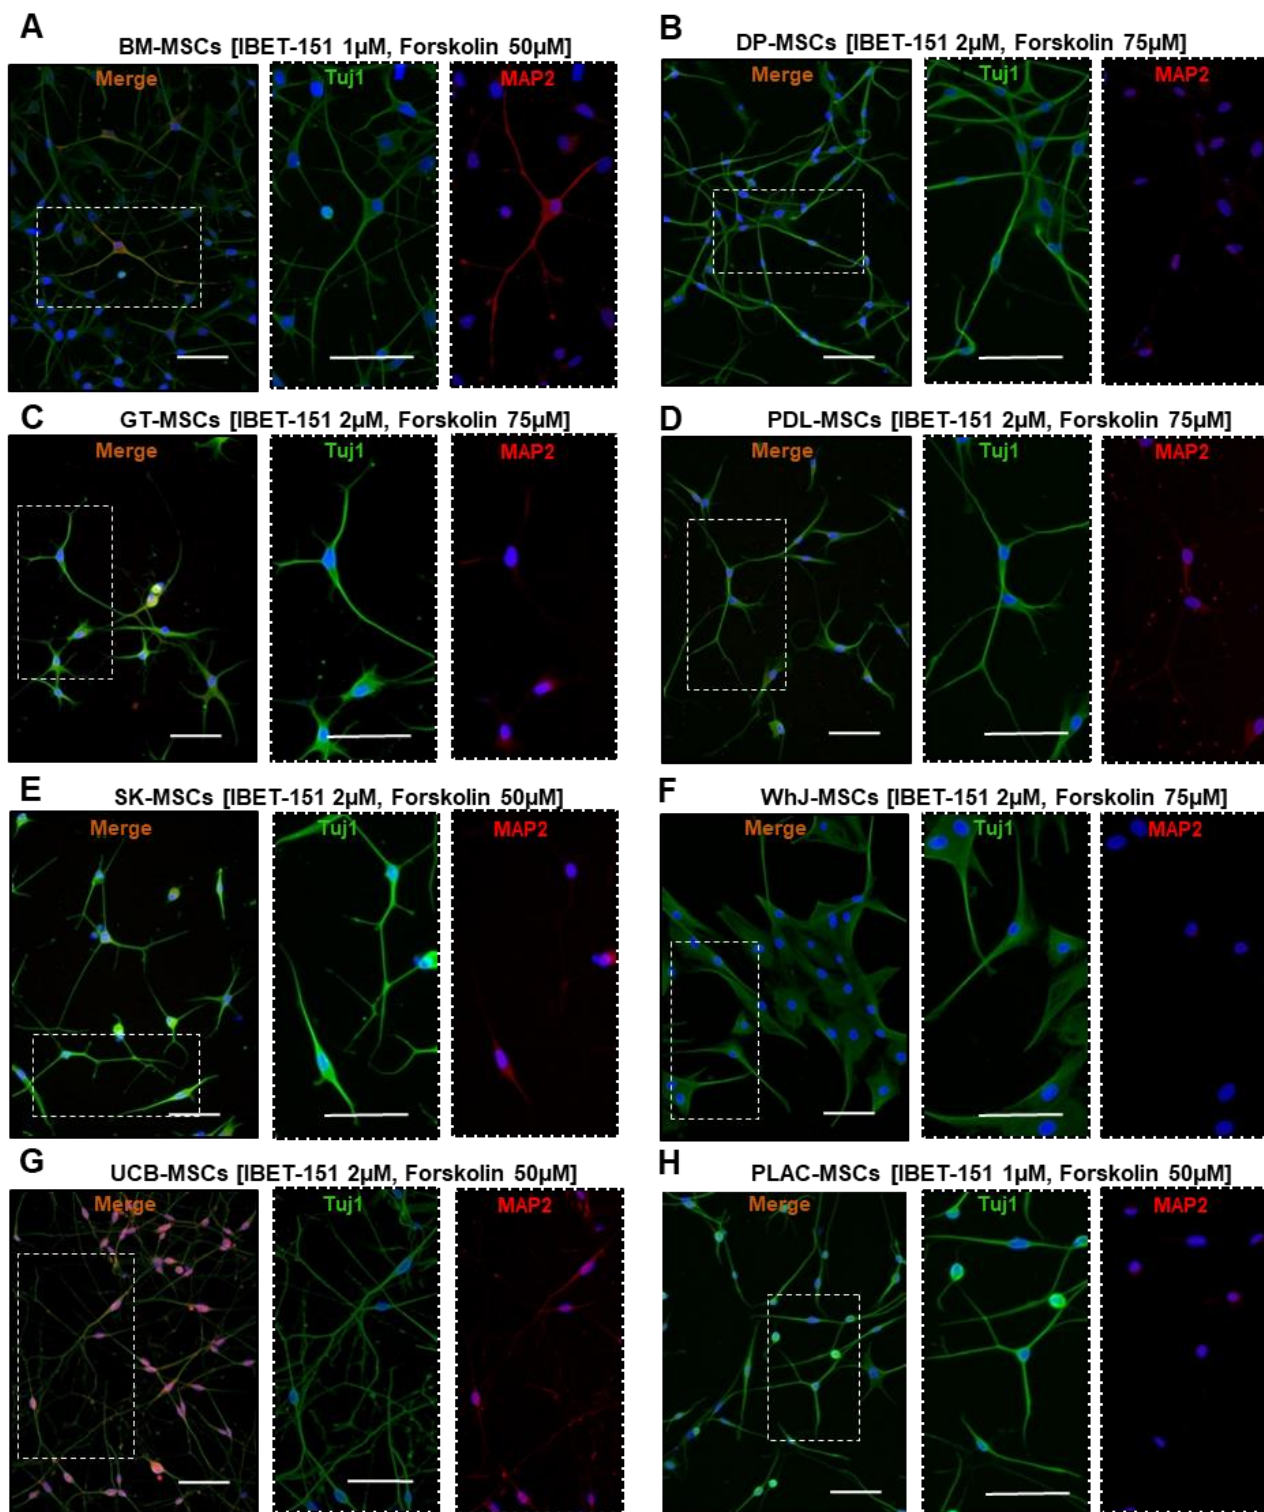

**Supplementary Figure 2, related to Figure 2 and Supplementary Table 4. Representative images for TUJ1 and MAP2 reactivity in each MSC source with increasing I-BET and/or forskolin concentration.** (A and G) UCB and BM-MSCs were the best sources for neuronal induction. Immunostaining showed cells positive for TUJ1 and MAP2 marker branched associated in both complex bodies. (B – E and H) Sources with intermediate effects. Immunostaining showed low numbers of cells per field, some with neuron-like morphology and MAP2 slight reactivity close to the nucleus and not in the branches. (F) Wharton's Jelly cells showed no neuronal induction. Representative images of three biological replicates per source. The scale bar represents 100 μm.

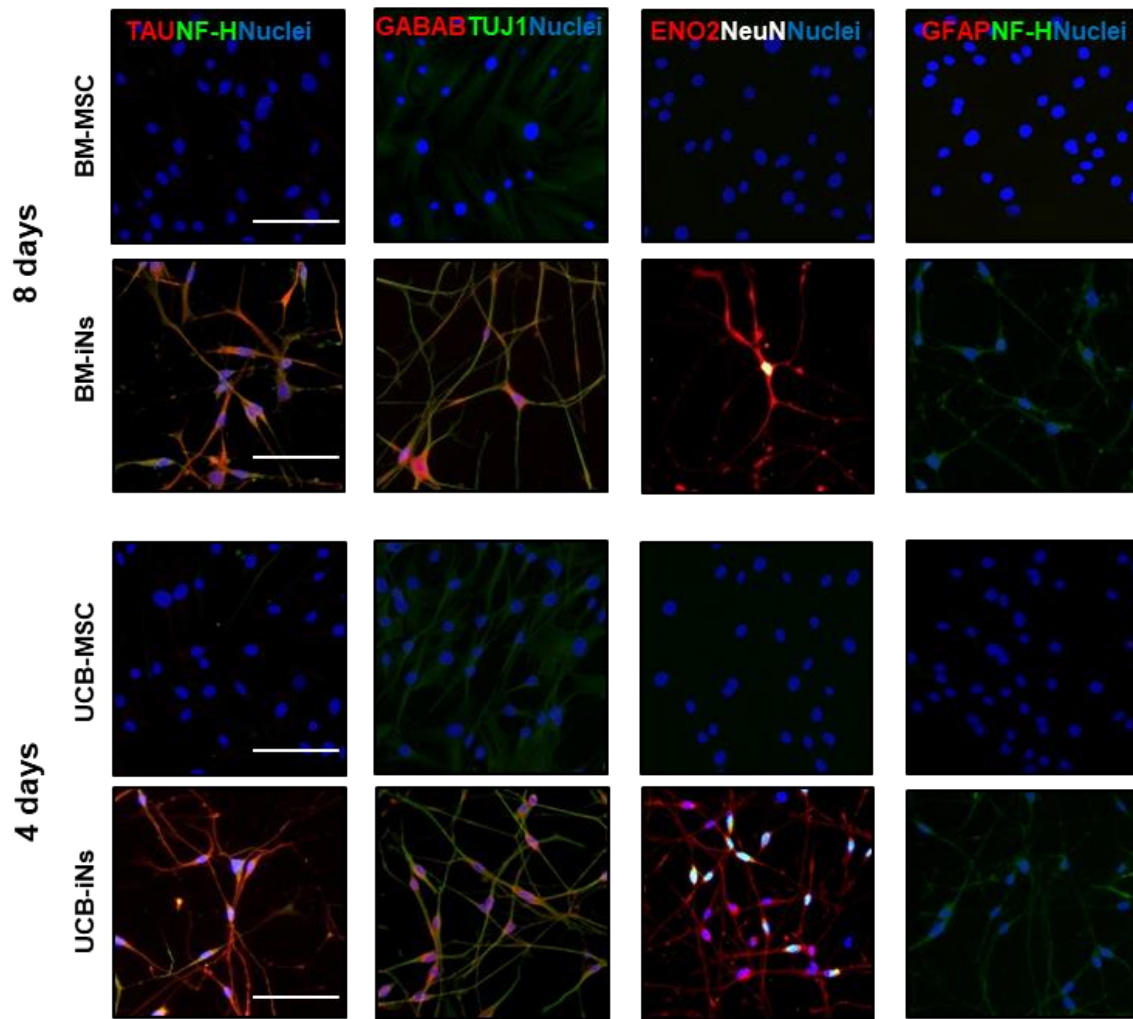

**Supplementary Figure 3, related to Figure 2. Mature neuronal marker reactivity in control and induced BM-MSCs and UCB-MSCS.** (A and B) Immunostaining analysis of neuronal markers (TAU, NF-H, GABA B, TUJ1, ENO2, NeuN) and astrocyte marker (GFAP) in MSCs cultured only in NM for 8 or 4 days and after the neuronal induction process. The GFAP marker was negative in cells under basal conditions and in the process of differentiation, while the neuronal mature markers only appear in BM-iNs and UCB-iNs. The TUJ1 neuronal marker has basal reactivity in undifferentiated MSCs, which was considered negative due to the absence of neuronal morphology. Representative images of n=3 independent experiments are shown. The scale bar represents 100  $\mu$ m.

**Supplementary Table 4, related to Figures 1 and 2. Percentages of neuronal properties and necrosis in all sources of MSCs with increasing I-BET151 and/or forskolin concentrations.**

The table shows the change in neuronal properties and necrosis generated by the original ICFRYA cocktail, with the elimination of I-BET151 and with increasing concentrations of I-BET151 and/or forskolin, from which the best conditions for each source were selected.

| CONDITION                | ICFRYA    | NO IBET-151 | I [2µM]   | F [75µM]  | I [2µM]<br>F [75µM] |
|--------------------------|-----------|-------------|-----------|-----------|---------------------|
| PROPERTIE                |           |             |           |           |                     |
| <b>WhJ-MSC (8 days)</b>  |           |             |           |           |                     |
| TUJ1                     | 0.1±0.3   | 0.9±1.2     | 1.3±1.5   | 0.9±0.6   | 3.7±3.6             |
| MAP2                     | 0.0±0.0   | 0.0±0.0     | 0.1±0.3   | 0.0±0.0   | 0.0±                |
| Necrosis                 | 48.3±10.8 | 43.3±23.5   | 63.4±13.5 | 46.2±19.6 | 68.2±8.8            |
| <b>DP-MSC (8 days)</b>   |           |             |           |           |                     |
| TUJ1                     | 49.5±13.4 | 12.3±10.9   | 49.5±18.7 | 43.8±11.6 | 62.3±15.2           |
| MAP2                     | 0.7±0.9   | 0.1±0.2     | 4.4±6.7   | 1.9±3.0   | 6.1±12.5            |
| Necrosis                 | 50.7±11.8 | 40.9±19.6   | 64.1±4.8  | 58.2±7.8  | 70.6±8.8            |
| <b>PDL-MSC (8 days)</b>  |           |             |           |           |                     |
| TUJ1                     | 42.1±12.1 | 11.7±9.5    | 49.5±20.2 | 47.3±14.8 | 54.7±20.4           |
| MAP2                     | 2.2±2.6   | 0.0±0.0     | 10.3±10.8 | 11.2±13.5 | 12.4±8.4            |
| Necrosis                 | 62.0±12.0 | 34.9±21.1   | 68.3±12.0 | 72.7±13.9 | 82.6±9.6            |
| <b>GT-MSC (8 days)</b>   |           |             |           |           |                     |
| TUJ1                     | 31.8±12.7 | 3.5±3.7     | 29.2±10.5 | 32.5±13.7 | 23.8±1.4            |
| MAP2                     | 2.0±2.5   | 0.0±0.0     | 3.4±5.0   | 3.5±4.0   | 1.2±2.1             |
| Necrosis                 | 52.1±15.0 | 18.8±14.0   | 58.3±16.9 | 64.6±13.7 | 81.8±9.5            |
| <b>SK-MSC (8 days)</b>   |           |             |           |           |                     |
| TUJ1                     | 34.1±11.7 | 0.1±0.1     | 56.4±36.7 | 41.5±27.0 | 50.3±32.6           |
| MAP2                     | 6.3±5.8   | 0.0±0.0     | 8.4±6.0   | 2.2±1.1   | 6.3±4.8             |
| Necrosis                 | 68.6±22.7 | 3.0±1.3     | 71.7±11.5 | 74.2±18.0 | 80.4±10.3           |
| <b>PLAC-MSC (8 days)</b> |           |             |           |           |                     |
| TUJ1                     | 67.2±4.0  | 1.9±1.0     | 71.0±2.7  | 68.5±6.5  | ND                  |
| MAP2                     | 1.8±1.0   | 0.0±0.0     | 2.3±0.4   | 1.7±1.5   | ND                  |
| Necrosis                 | 53.4±2.0  | 35.1±18.9   | 63.7±8.9  | 56.6±10.7 | ND                  |
| <b>UCB-MSC (4 days)</b>  |           |             |           |           |                     |
| TUJ1                     | 80.7±9.7  | 0.9±0.9     | 77.6±10.7 | 75.1±11.9 | ND                  |
| MAP2                     | 1.9±0.5   | 0.0±0.0     | 4.9±0.4   | 1.8±0.6   | ND                  |
| Necrosis                 | 17.9±10.3 | 3.2±1.7     | 25.0±8.8  | 22.8±9.8  | ND                  |
| <b>BM-MSC (8 days)</b>   |           |             |           |           |                     |
| TUJ1                     | 53.9±12.0 | 2.9±1.2     | 66.2±10.3 | 56.3±8.5  | 41.5±18.6           |
| MAP2                     | 12.4±4.0  | 0.0±0.0     | 24.5±4.7  | 16.0±4.0  | 14.3±5.8            |
| Necrosis                 | 48.6±6.3  | 8.9±7.8     | 71.8±5.5  | 64.7±13.8 | 75.9±11.2           |

**Supplementary Table 5, related to figure 4. Primers for qPCR used in this study.**

| PCR PRIMERS                                                       | REFSEQ         | FORWARD (5' - 3')            | REVERSE (5' - 3')         | PRODUCT SIZE (bp) | AMPLIFICATION EFFICIENCY |
|-------------------------------------------------------------------|----------------|------------------------------|---------------------------|-------------------|--------------------------|
| TATA box binding protein (TBP)                                    | NM_003194.4    | GCAAGGGTTTCTGGTTTGCC         | CAAGCCCTGAGCGTAAGGTG      | 80                | 1.05                     |
| Hypoxanthine phosphoribosyl transferase 1 (HPRT1)                 | NM_000194.2    | CCCTGGCGTCGTGATTAGTG         | TCGAGCAAGACGTTCACTCC      | 139               | 1.01                     |
| Thy-1 cell surface antigen (THY1) (CD90)                          | NM_006288.3    | CAGCATCGCTCTCTGCTAA          | ACTGGATGGGTGAACTGCTG      | 134               | 0.99                     |
| Endoglin (ENG) (CD105)                                            | NM_00018.3     | CCTGACCTGTCTGTTGCAC          | ACGCGTGTGCGAGTAGATG       | 126               | 1.04                     |
| 5' ecto-nucleotidase (CD73) (NT5E)                                | NM_002526.3    | GATGAACGCAACAA TGGCACA       | CAAA TGTGCTCCAAAGGGC      | 70                | 1.09                     |
| Tubulin, beta 3 class III ( $\beta$ IIIITUB)                      | NM_006086.3    | AGTGCGGCAACCA GATCG          | GCACGTACTTGAGAAAGAGG      | 150               | 1.04                     |
| Microtubule-associated protein 2 (MAP2)                           | NM_002374.3    | GCTCCCGGAGAAAGGATTCTG        | CAAGCTGAAGAATCAGCGCA      | 82                | 0.91                     |
| Neurofilament, heavy polypeptide (NF-H)                           | NM_021076.3    | GAGGAGTGGTTCGAGTGAG          | CGTCTGTGTTACCTTGCT        | 61                | 1.06                     |
| Doublecortin (DCX)                                                | NM_000555.3    | AAAGACACTGGCTGTTCCCTG        | CCCAAGGTAGCATCTCCAGC      | 184               | 1.02                     |
| Neuronal differentiation 1 (NEUROD1)                              | NM_002500.4    | ACAA CAAAGGAAA TCGAAACA TGAC | ATCAGCCCACTCTGCTGTA       | 52                | 1.02                     |
| Neural Cell Adhesion Molecule (NCAM)                              | NM_000615.6    | GCAGCGAAGAAA GACTCTGG        | CTGGA TGCTCTCAGGGTCA      | 83                | 1.04                     |
| Microtubule associated protein Tau (MAPT)                         | NM_016835.4    | ACCA GCTCCGGCA CCAA          | CCTGGTTCAAA GTTCACCTGATAG | 134               | 1.03                     |
| Microtubule associated protein Tau (TAU)                          | NM_016835.4    | TCCGGCACCAACAGCAG            | TCCTGGTTCAAA GTTCACCTGAT  | 129               | 1.03                     |
| Enolase 2 (ENO2)                                                  | NM_001975.2    | TGCA CAGGCCA GATCAAGAC       | ACAGCACACTGGGATTACGG      | 139               | 0.99                     |
| Gamma-aminobutyric acid type B receptor subunit 1 (GABAB)         | NM_001319053.1 | ACTGTTTCCCATGAGCGGG          | TGGATCACACTTGCTGTCGT      | 145               | 1.05                     |
| RNA binding protein, fox-1 homolog (C. elegans) 3 (RBFOX3) (NeuN) | NM_001082575.2 | AGCCTACAGCGACAGTTACG         | GTCCGAGAA GGAAACGGTGG     | 123               | 1.1                      |
